# Supplementary material
Source: publisher site journal article supplement (https://kjim.org/upload/media/kjim-2023-311-Supplementary-Table-3.pdf)
Supplement: Supplementary file 1 [file kjim-2023-311-Supplementary-Table-3.pdf]

**Supplementary Table 3. The results of node-splitting method for local inconsistencies**

| Comparison  | Direct                    | Indirect                 | Difference               | <i>p</i> value |
|-------------|---------------------------|--------------------------|--------------------------|----------------|
| <b>48VR</b> |                           |                          |                          |                |
| BSV vs. ETV | -0.104 (-1.040 to 0.832)  | -0.146 (-0.644 to 0.353) | 0.042 (-1.019 to 1.103)  | 0.938          |
| BSV vs. TAF | 0.220 (-0.325 to 0.765)   | 0.318 (-0.372 to 1.009)  | -0.098 (-0.978 to 0.781) | 0.827          |
| BSV vs. TDF | 0.224 (-0.449 to 0.896)   | 0.154 (-0.400 to 0.709)  | 0.069 (-0.862 to 0.941)  | 0.876          |
| ETV vs. TDF | 0.319 (0.172 to 0.467)    | 0.277 (-0.773 to 1.328)  | 0.042 (-1.019 to 1.103)  | 0.938          |
| TAF vs. TDF | -0.097 (-0.515 to 0.320)  | 0.001 (-0.773 to 0.775)  | -0.098 (-0.970 to 0.773) | 0.827          |
| <b>96VR</b> |                           |                          |                          |                |
| BSV vs. TAF | -0.405 (-2.045 to 1.236)  | -0.403 (-1.902 to 1.096) | -0.003 (-2.226 to 2.220) | 0.998          |
| ETV vs. TDF | -0.490 (-1.977 to 0.997)  | -0.492 (-2.145 to 1.160) | 0.002 (-2.220 to 2.225)  | 0.998          |
| TAF vs. TDF | -0.087 (-0.280 to 0.106)  | -0.084 (-0.278 to 0.109) | -0.003 (-2.226 to 2.221) | 0.998          |
| <b>48BR</b> |                           |                          |                          |                |
| BSV vs. ETV | 0.965 (-0.410 to 2.340)   | 0.366 (-0.306 to 1.037)  | 0.600 (-0.931 to 2.130)  | 0.443          |
| BSV vs. TAF | 0.319 (-0.404 to 1.041)   | 0.335 (-0.643 to 1.313)  | -0.016 (-1.232 to 1.200) | 0.979          |
| BSV vs. TDF | 0.041 (-0.804 to 0.885)   | 0.364 (-0.432 to 1.161)  | -0.324 (-1.484 to 0.837) | 0.585          |
| ETV vs. TDF | -0.254 (-0.505 to -0.002) | -0.853 (-2.367 to 0.660) | 0.599 (-0.931 to 2.130)  | 0.443          |
| TAF vs. TDF | -0.116 (-0.767 to 0.535)  | -0.100 (-1.126 to 0.927) | -0.016 (-1.232 to 1.200) | 0.979          |
| <b>48SR</b> |                           |                          |                          |                |
| BSV vs. ETV | -0.405 (-2.047 to 1.236)  | -0.403 (-1.902 to 1.096) | -0.003 (-2.226 to 2.220) | 0.998          |
| BSV vs. TDF | -0.490 (-1.977 to 0.997)  | -0.492 (-2.145 to 1.160) | 0.002 (-2.220 to 2.225)  | 0.998          |
| ETV vs. TDF | -0.082 (-0.275 to 0.111)  | -0.084 (-2.293 to 2.125) | -0.003 (-2.226 to 2.221) | 0.998          |

Values are presented as coefficient (95% confidence interval).

48VR, 48-week virologic response; 96VR, 96-week virologic response; 48BR, 48-week biochemical response; 48SR, 48-week serologic response; BSV, besifovir dipivoxil maleate; ETV, entecavir; TAF, tenofovir alafenamide; TDF, tenofovir disoproxil fumarate.
